# Supplementary material for: Effect of Hyperoxia on Myocardial Oxygenation and Function in Patients With Stable Multivessel Coronary Artery Disease
Source: PubMed Central journal article supplement — J Am Heart Assoc. 2020 Feb 22;9(5):e014739. doi: 10.1161/JAHA.119.014739 (PMC7335579; doi:10.1161/jaha.119.014739), 2020-02-22
Supplement: JAH3-9-e014739-s001.pdf [file JAH3-9-e014739-s001.pdf]

# **SUPPLEMENTAL MATERIAL**

**Table S1. Impact of Myocardial Injury on the Ventricular Response to Hyperoxia.**

|                                                 | Normal T1<br>(<1220ms) | Abnormal T1<br>(≥1220ms) | p-value       |
|-------------------------------------------------|------------------------|--------------------------|---------------|
| <b>LV Function</b>                              |                        |                          |               |
| Ejection Fraction (%)                           | 2.3±3.4                | -3.3±5.2                 | <b>0.017*</b> |
| End Diastolic Volume Index (ml/m <sup>2</sup> ) | 2±5                    | 1±8                      | 0.852         |
| End Systolic Volume Index (ml/m <sup>2</sup> )  | -1±2                   | 2±5                      | 0.092         |
| Stroke Volume Index (ml/m <sup>2</sup> )        | 3±6                    | -1±6                     | 0.132         |
| Cardiac Index (L/min/m <sup>2</sup> )           | 0.00±0.41              | -0.20±0.40               | 0.303         |
| <b>FT-CMR</b>                                   |                        |                          |               |
| <b>Circumferential</b>                          |                        |                          |               |
| Peak Strain (PSc, %)                            | -0.6±1.1               | 0.8±1.6                  | <b>0.025*</b> |
| Time to Peak Strain (TTPc, ms)                  | 6±30                   | 23±37                    | 0.298         |
| Systolic Strain Rate (sSRc, /s)                 | -0.03±0.09             | 0.05±0.11                | 0.093         |
| Diastolic Strain Rate (e-dSRc, /s)              | -0.03±0.19             | -0.18±0.57               | 0.505         |
| <b>Radial</b>                                   |                        |                          |               |
| Peak Strain (PSR, %)                            | 2.0±3.9                | -2.0±5.4                 | <b>0.047*</b> |
| Time to Peak Strain (TTPR, ms)                  | 1±22                   | 19±59                    | 0.454         |
| Systolic Strain Rate (sSRR, /s)                 | -0.05±0.35             | -0.18±0.39               | 0.485         |
| Diastolic Strain Rate (e-dSRR, /s)              | -0.00±0.20             | 0.24±0.75                | 0.407         |
| Displacement (DisPR, mm)                        | 0.3±0.6                | -0.2±0.6                 | 0.120         |
| Time to Displacement (TTDR, ms)                 | 11±34                  | 12±38                    | 0.956         |
| Systolic Velocity (sVelR, mm/s)                 | 1.28±3.7               | -1.53±3.72               | 0.123         |
| Diastolic Velocity (e-VelR, mm/s)               | 3.41±8.25              | 0.95±6.11                | 0.482         |

The mean±SD delta responses of ventricular function and feature tracking (FT-CMR) measurements are displayed for CAD patients with normal (<1220 ms) or elevated (≥1220ms) T1. Patients with elevated T1 indicating myocardial injury experienced significant deterioration of ejection fraction and peak strain in response to hyperoxia.
